# Supplementary figures and images for: TGFβ-derived immune modulatory vaccine: targeting the immunosuppressive and fibrotic tumor microenvironment in a murine model of pancreatic cancer
Source: HighWire-hosted journal article supplement (doi:10.1136/jitc-2022-005491), 2022-12-01

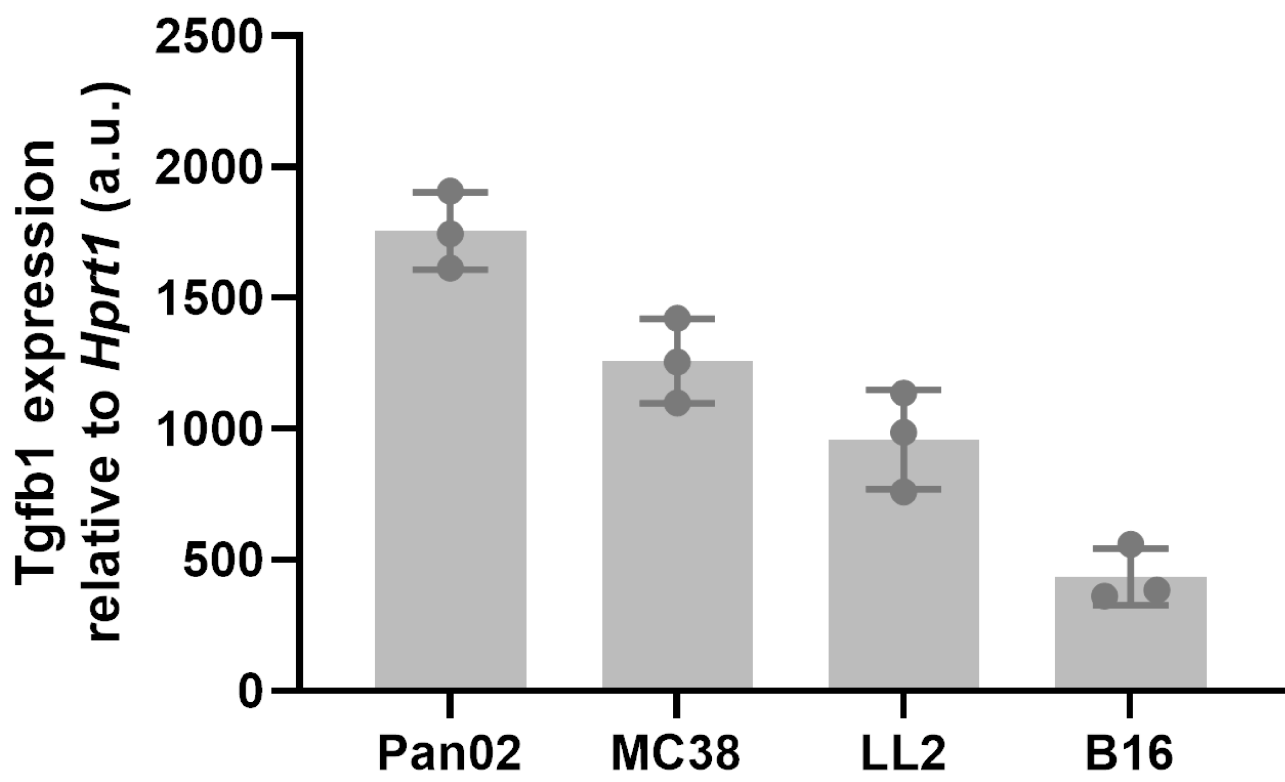

Supplement: jitc-2022-005491supp002_data_supplement.pdf [file jitc-2022-005491supp002_data_supplement.pdf]

supplementary figure 13.tiff

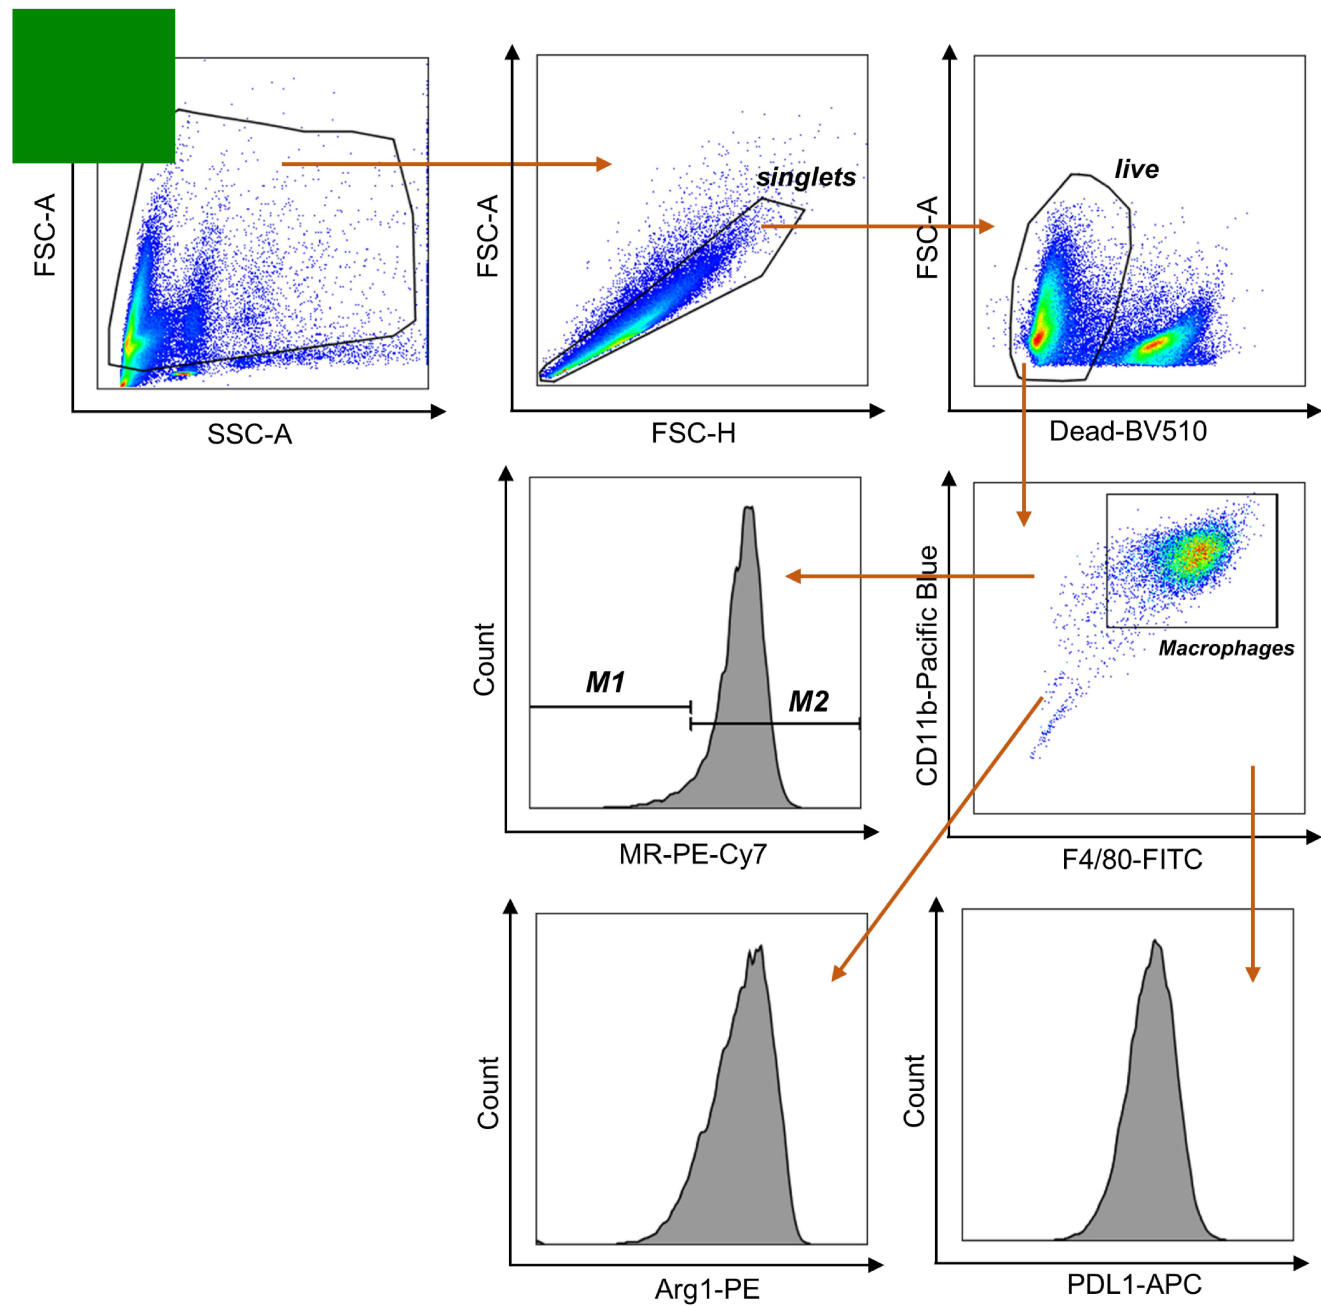

Supplement: jitc-2022-005491supp013_data_supplement.pdf [file jitc-2022-005491supp013_data_supplement.pdf]

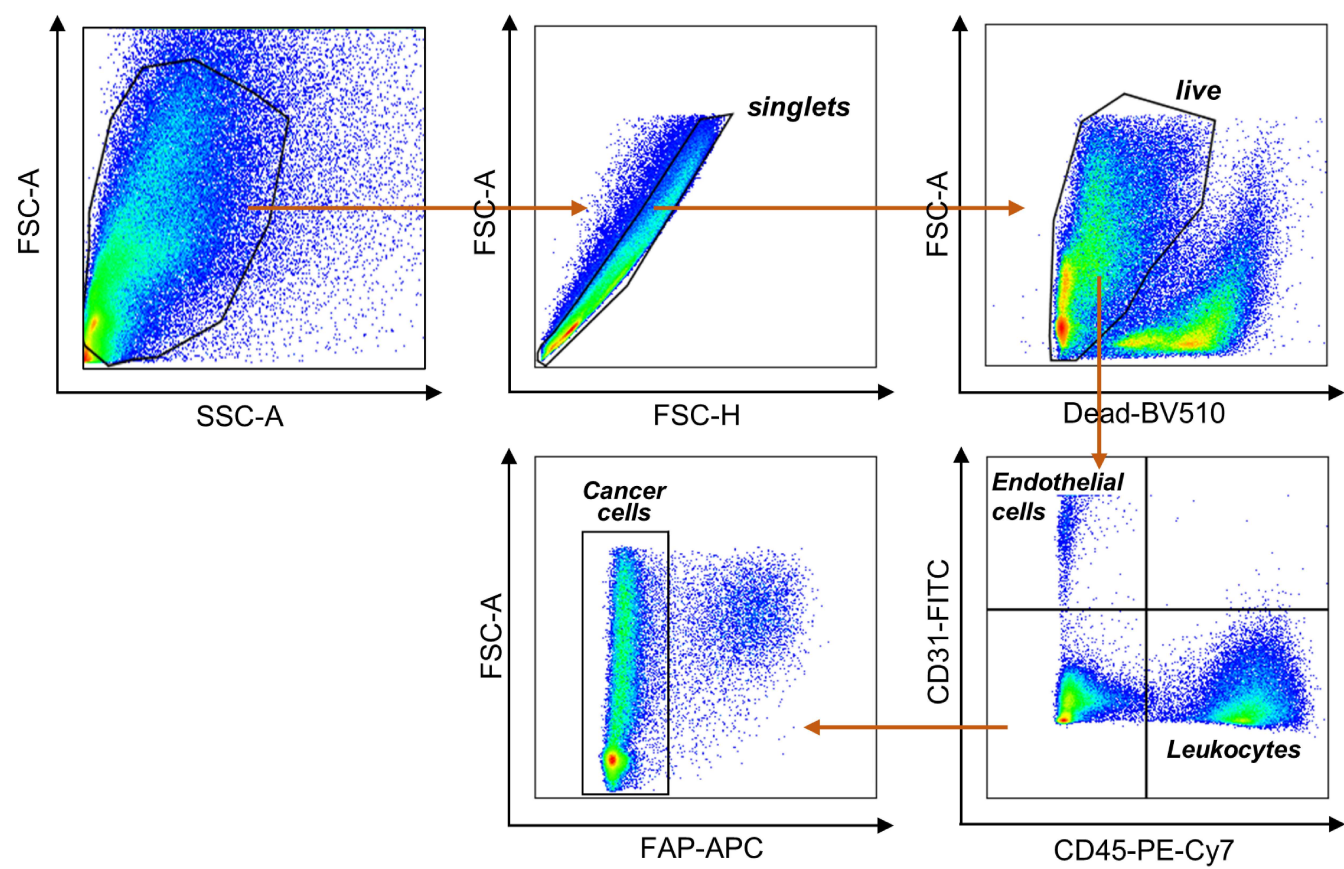

Supplement: jitc-2022-005491supp008_data_supplement.pdf [file jitc-2022-005491supp008_data_supplement.pdf]

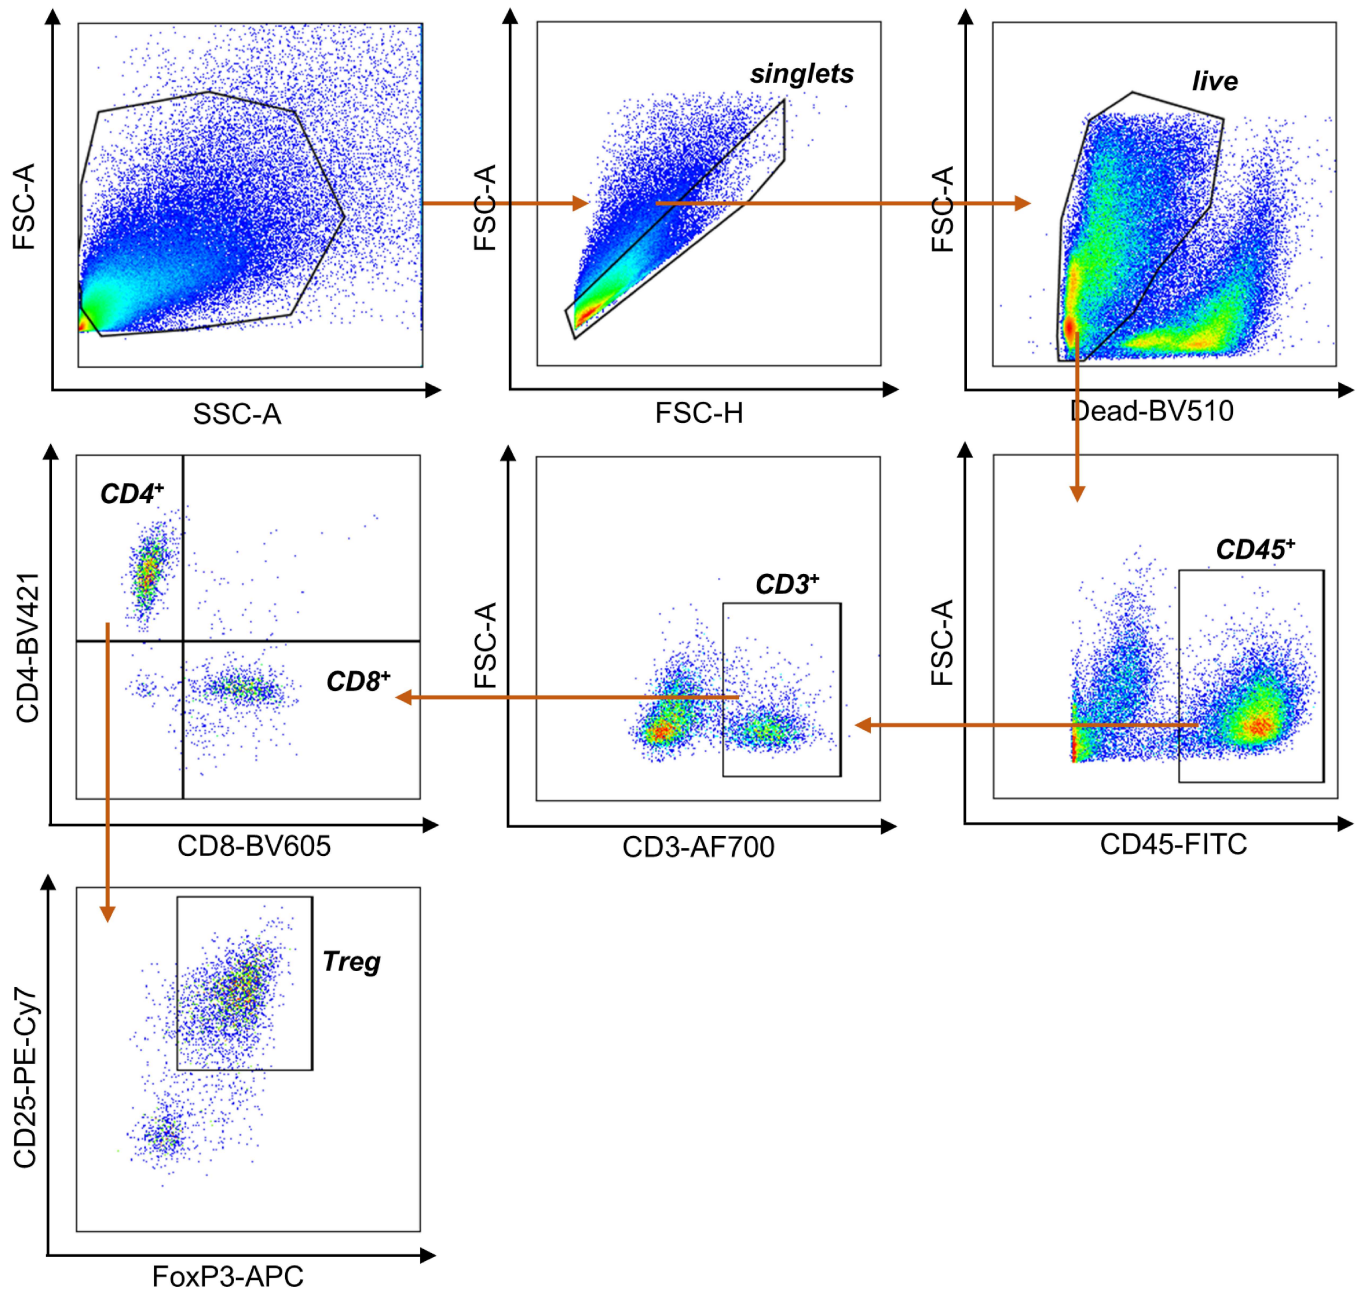

Supplement: jitc-2022-005491supp009_data_supplement.pdf [file jitc-2022-005491supp009_data_supplement.pdf]
